# Supplementary material for: Nomogram Models Based on the Gene Expression in Prediction of Breast Cancer Bone Metastasis
Source: J Healthc Eng. 2022 Aug 22;2022:8431946. doi: 10.1155/2022/8431946 (PMC9424032; doi:10.1155/2022/8431946)
Supplement: Supplementary Materials — Figure S1. Forest plot of univariate Cox regression analyses of prognosis. (A) Significant genes related to overall survival. (B) Significant genes related to progression-free survival. Figure S2. Prognostic genes related to overall survival by Kaplan-Meier plotter. Abbreviations: (L) Low; (H) High; HR, Hazard ratio. Figure S3. Prognostic genes related to progression-free survival by Kaplan-Meier plotter. Abbreviations: (L) Low; (H) High; HR, Hazard ratio. Figure S4. Calibration curves of gene expression signature-based nomogram models. (A) Calibration curve for predicting patient overall survival. (B) Calibration curve for predicting patient progression-free survival. [file 8431946.f1.zip]

Archive with 4 entries (4 files):
- Figure S1.eps
- Figure S2.eps
- Figure S3.eps
- Figure S4.eps
